# Supplementary material
Source: PubMed Central journal article supplement (PMC5376006)
Supplement: ajtr0009-1151-f5.pdf [file ajtr0009-1151-f5.pdf]

HoxB9 regulates metastasis via TGF- $\beta$ 1/Smad2/Slug signal in OSCC

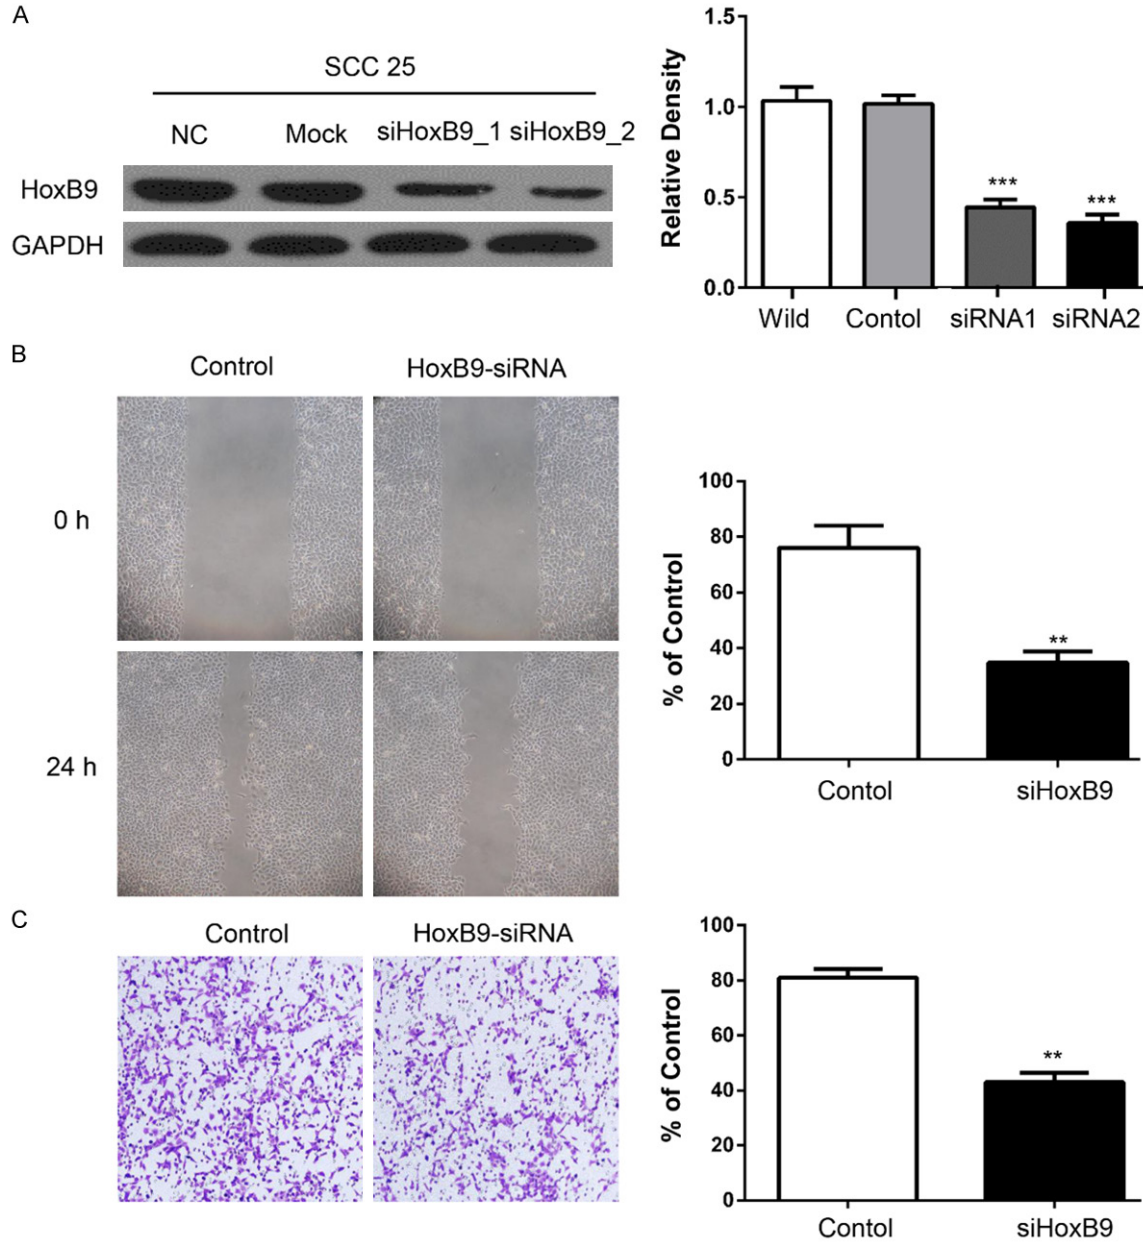

**Supplementary Figure 1.** Knockdown of HoxB9 decreases migration and invasion of SCC-25. A. Knockdown of HoxB9 by two different siRNA in SCC-25 cell line, GAPDH served as a loading control; Relative density data were calculated by Image J, and the data represented mean of three independent experiments. \*\*\* $P < 0.001$ ; B. Wound healing assay showed knockdown of HoxB9 suppressed the cell mobility of SCC-25 cell line, and quantification of wound closure shows the statistical significance of the difference (Mean  $\pm$  SD; \*\* $P < 0.01$ , student  $t$ -test with GraphPad Prism 5.0); C. Transwell assay showed the migration abilities of SCC-25 were impaired after knocking down of HoxB9 compared with those of control group, and quantification of cell numbers with Image J “cell counter” module (Mean  $\pm$  SEM; \*\* $P < 0.01$ , student  $t$ -test with GraphPad Prism 5.0 ( $n = 3$ )).

HoxB9 regulates metastasis via TGF- $\beta$ 1/Smad2/Slug signal in OSCC

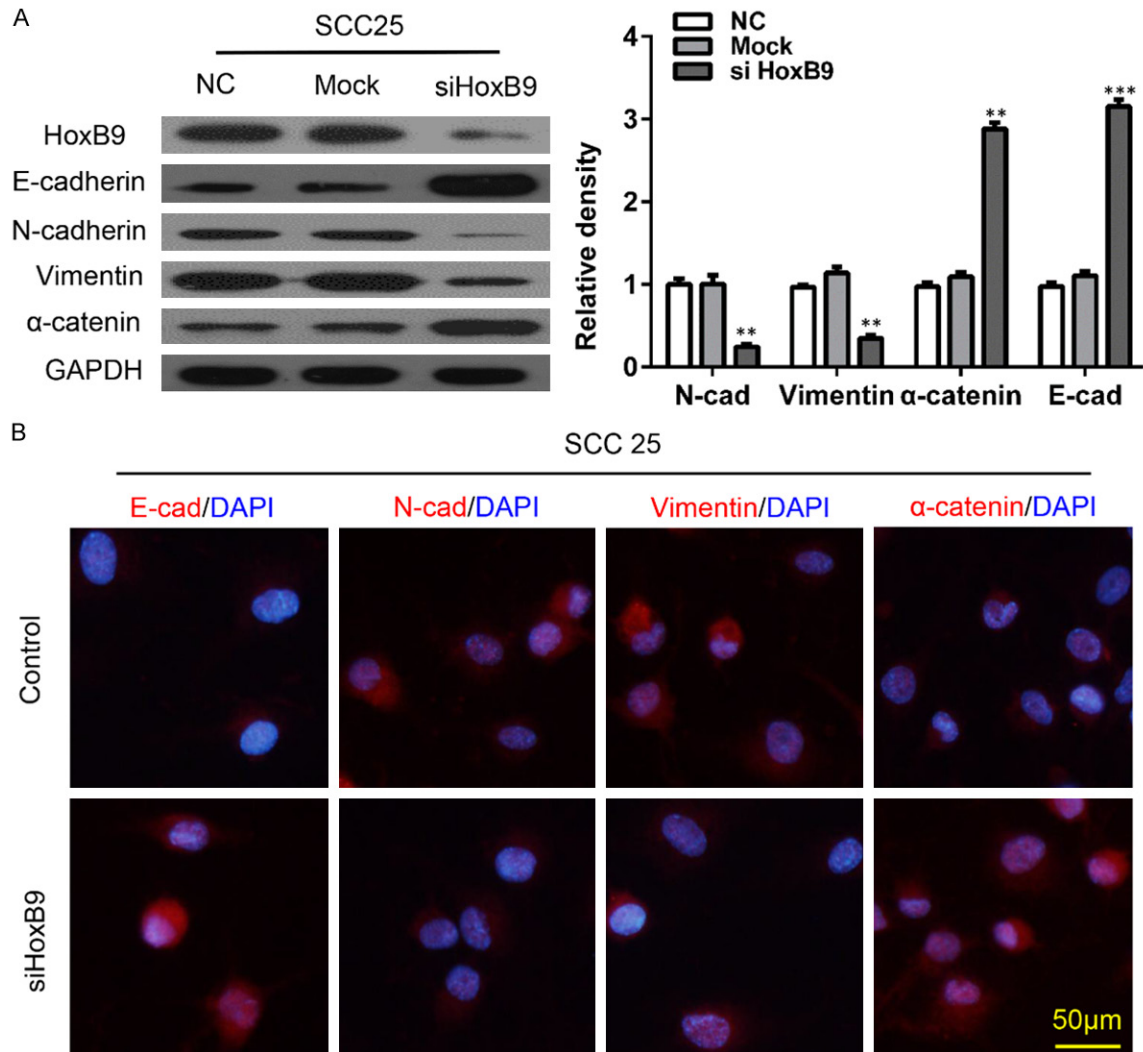

**Supplementary Figure 2.** HoxB9 regulates the transition between epithelial and mesenchymal phenotypes in SCC-25 cells. A. SCC-25 cells were treated with siRNA for HoxB9, then the E-cadherin, N-cadherin, Vimentin and  $\alpha$ -catenin levels were determined. GAPDH was the internal standard for protein loading. The values are presented as the means  $\pm$  SEM. One-way ANOVA with post-Dunnett analysis was performed using GraphPad Prism 5.0. \*\*P < 0.01, versus the control group. (n = 3); B. SCC-25 cells were treated with siRNA for HoxB9, the representative immunofluorescence of E-cadherin, N-cadherin, Vimentin and  $\alpha$ -catenin were determined (Scale bars = 50  $\mu$ m).

HoxB9 regulates metastasis via TGF- $\beta$ 1/Smad2/Slug signal in OSCC

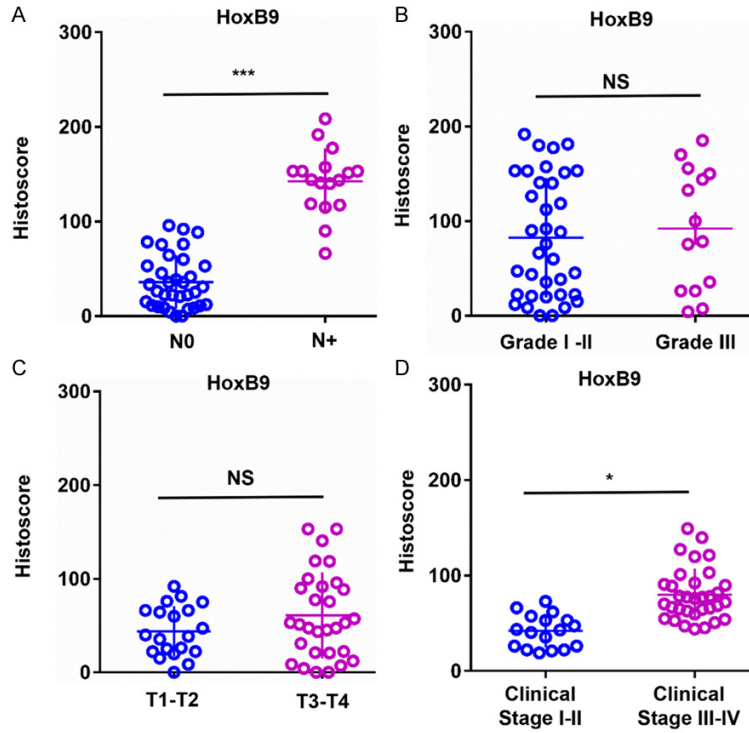

**Supplementary Figure 3.** HoxB9 expression in different Grades, T categories and N categories of OSCC. A. HoxB9 expression was correlated with lymph node metastasis of OSCC; B. HoxB9 expression was not correlated with different pathological grades (I-III) of OSCC; C. HoxB9 expression was not correlated with T category of OSCC; D. HoxB9 expression was correlated with clinical stages of OSCC (Mean  $\pm$  SEM; \*P < 0.05, \*\*\*P < 0.001, t test).
